# Supplementary material for: Illusory finger stretching and somatosensory responses in participants with chronic hand-based pain
Source: PubMed Central journal article supplement (PMC11793786; doi:10.1371/journal.pone.0317693), 2025-02-04
Supplement: pone.0317693.s003.pdf [file pone.0317693.s003.pdf]

Exploratory analyses of the subjective disownership data using a Friedman test found a significant overall effect of condition with a small to moderate effect size ( $\chi^2(3) = 13.12, p = 0.004$ , Kendall's  $W = 0.21$ ) and post hoc Wilcoxon tests with Holm corrections found significantly greater combined disownership score in the UV condition (Median = 42, SD = 42.32) compared to the NI (Median = 0, SD = 19.63,  $z = 16, p.adj = 0.039, r = -39.78$ ), NIT (Median = 0, SD = 15.24,  $z = 12, p.adj = 0.025, r = -48.25$ ), and MS conditions, (Median = 1.5, SD = 22.34,  $z = 22, p.adj = 0.042, r = -40$ ).

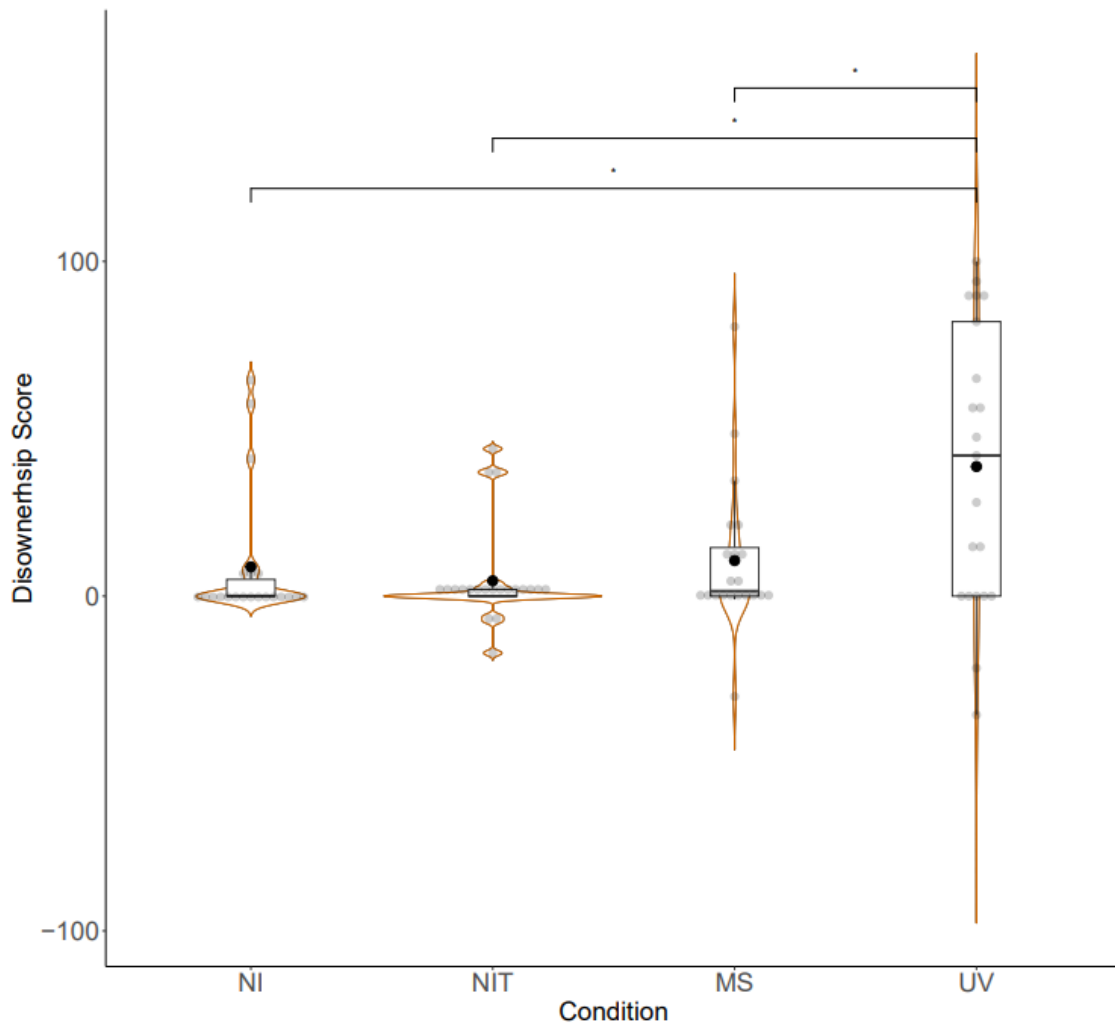

**S3 Fig. Combined Disownership Score Index Across Conditions (NI: Non-Illusion; NIT: Non-Illusion Tactile; MS: Multisensory; UV: Unimodal Visual).** Scores below 50 indicate disagreement with experience of disownership statements, whilst scores above 50 indicate agreement. A continuous visual analogue scale was used in data collection, with agreement and disagreement statements located at each end of the scale. Box plots show means, medians and inter-quartile ranges of data. Medians are indicated with a horizontal line whilst means are indicated by a black dot. Data points are shown in grey jitter binned along the y-axis, grouped by condition.
