# Supplementary material for: Illusory finger stretching and somatosensory responses in participants with chronic hand-based pain
Source: PubMed Central journal article supplement (PMC11793786; doi:10.1371/journal.pone.0317693), 2025-02-04
Supplement: pone.0317693.s004.pdf [file pone.0317693.s004.pdf]

Exploratory analyses of the subjective control data using a Friedman test found a significant overall effect of condition with a small effect size ( $\chi^2(3) = 11.61, p = 0.009$ , Kendall's  $W = 0.18$ ). Post hoc Wilcoxon tests with Holm corrections for multiple comparisons found a significant difference between NI and UV control scores ( $z = 1, p_{adj} = 0.031, r = -0.16$ ) however found no significant differences between control scores across any other condition: NI (Median = 0, SD = 21.8), NIT (Median = 0, SD = 9.2), MS (Median = 0, SD = 17.28), UV (Median = 6, SD = 24.02).

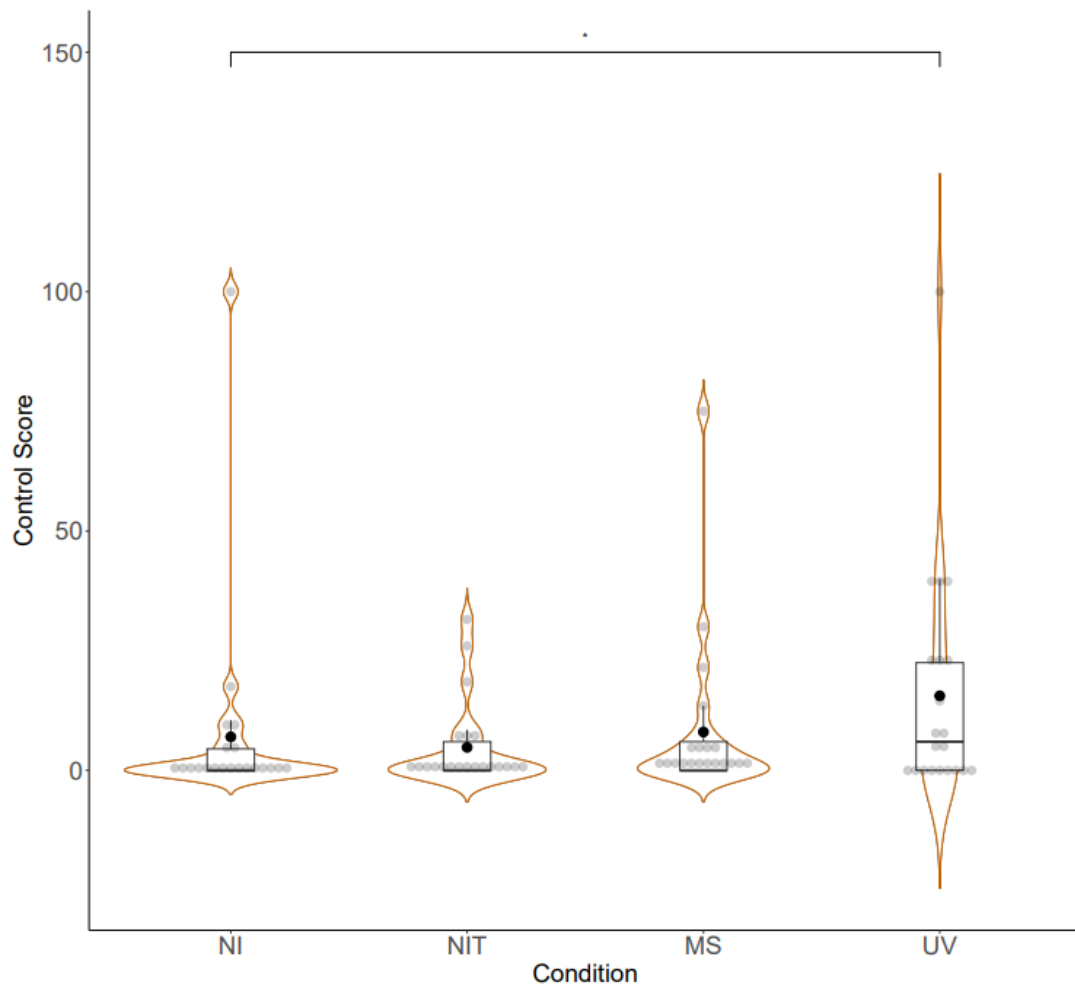

**S4 Fig. Combined Control Scores Across Conditions (NI: Non-Illusion Tactile; NIT: Non-Illusion Tactile; MS: Multisensory; UV: Unimodal Visual).** Scores below 50 indicate disagreement with experience of control statements, whilst scores above 50 indicate agreement. A continuous visual analogue scale was used in data collection, with agreement and disagreement statements located at each end of the scale. Box plots show means, medians and inter-quartile ranges of data. Medians are indicated with a horizontal line whilst means are indicated by a black dot. Data points are shown in grey jitter binned along the y-axis, grouped by condition.
