# Supplementary material for: Illusory finger stretching and somatosensory responses in participants with chronic hand-based pain
Source: PubMed Central journal article supplement (PMC11793786; doi:10.1371/journal.pone.0317693), 2025-02-04
Supplement: pone.0317693.s006.pdf [file pone.0317693.s006.pdf]

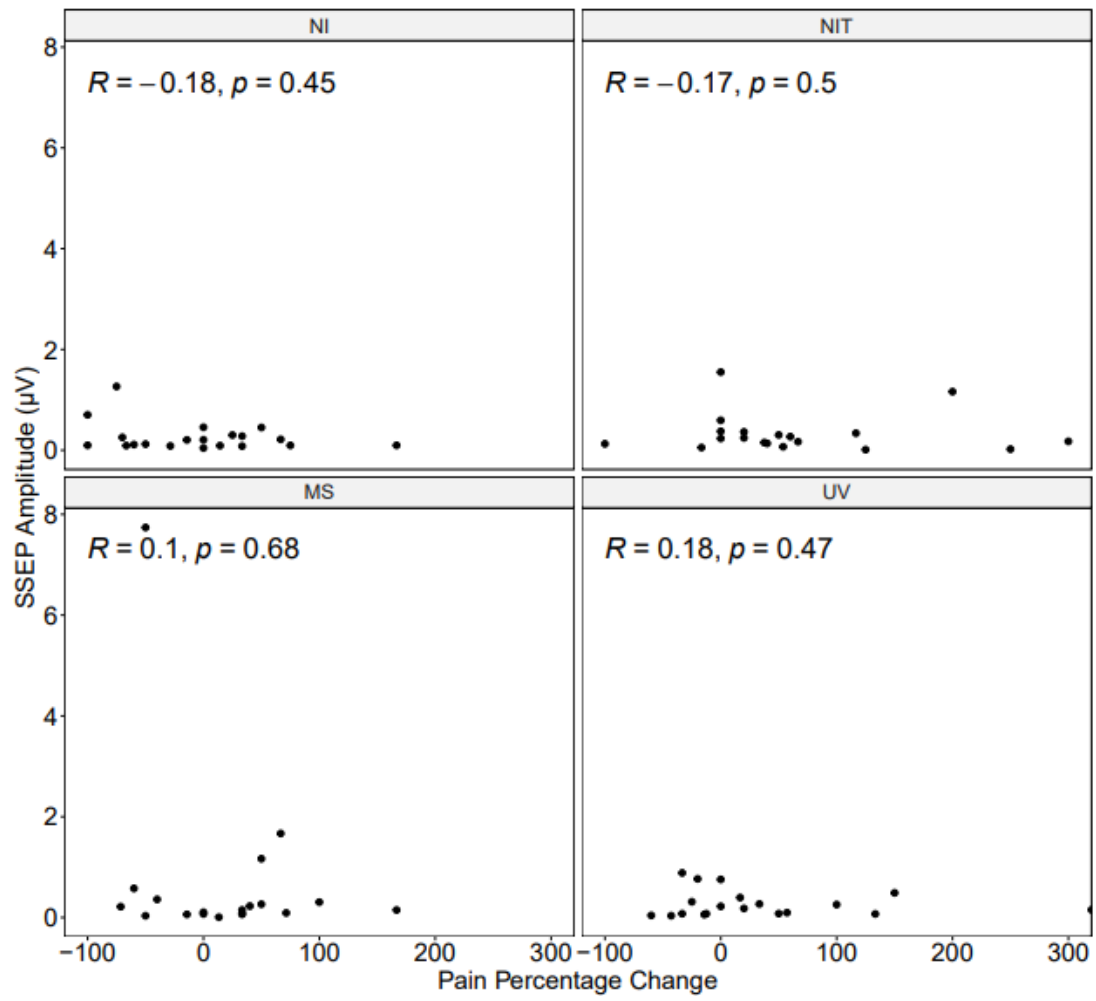

**S6 Fig. Correlation Between Amplitude and Pain Percentage Change for Each Condition.**
