# Supplementary material for: Illusory finger stretching and somatosensory responses in participants with chronic hand-based pain
Source: PubMed Central journal article supplement (PMC11793786; doi:10.1371/journal.pone.0317693), 2025-02-04
Supplement: pone.0317693.s009.pdf [file pone.0317693.s009.pdf]

No differences in pain levels were found for chronic secondary pain conditions when comparing NI pre (Median = 4.5, SD = 3.47) and post (Median = 6, SD = 3.7) pain levels ( $z = 13.5$ ,  $p.adj = 0.595$ ,  $r = 13.5$ ), nor when comparing NIT pre (Median = 3.5, SD = 2.57) and post (Median = 2, SD = 3.43) pain levels ( $z = 15$ ,  $p.adj = 0.932$ ,  $r = 15$ ), MS pre (Median = 4.5, SD = 3.06) and post (Median = 3.5, SD = 3.62) levels ( $z = 16$ ,  $p.adj = 0.474$ ,  $r = 16$ ) nor UV pre (Median = 3.5, SD = 2.85) and post (Median = 3, SD = 2.37) levels ( $z = 8.5$ ,  $p.adj = 0.386$ ,  $r = 8.5$ ).

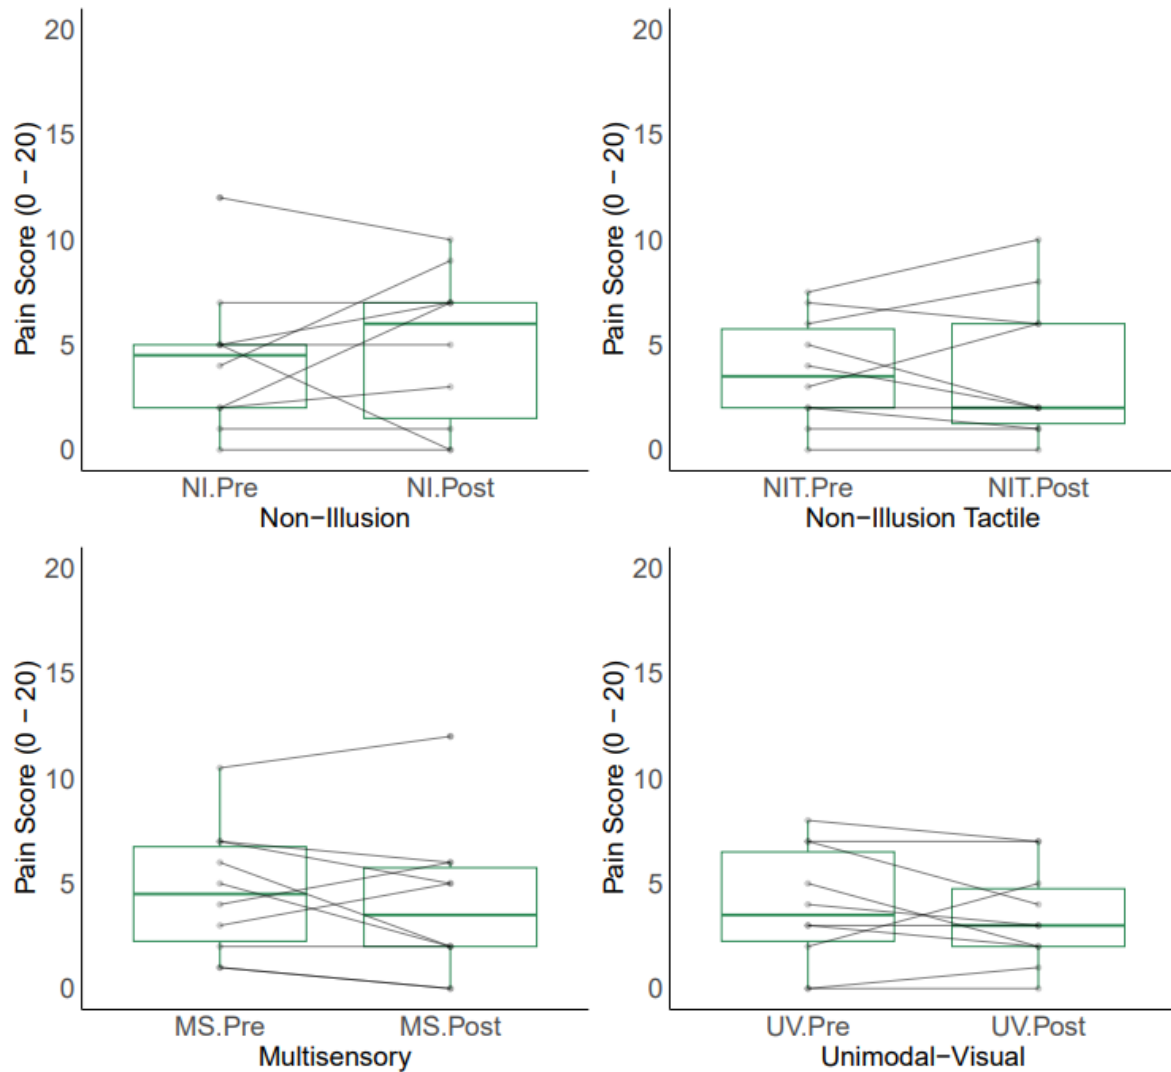

**S9 Fig. Pre and Post Pain Scores Across Conditions for Participants with Chronic Secondary Pain.** Box plots show medians and inter-quartile ranges of data. Paired data points are shown in grey.
