# Supplementary material for: Illusory finger stretching and somatosensory responses in participants with chronic hand-based pain
Source: PubMed Central journal article supplement (PMC11793786; doi:10.1371/journal.pone.0317693), 2025-02-04
Supplement: pone.0317693.s010.pdf [file pone.0317693.s010.pdf]

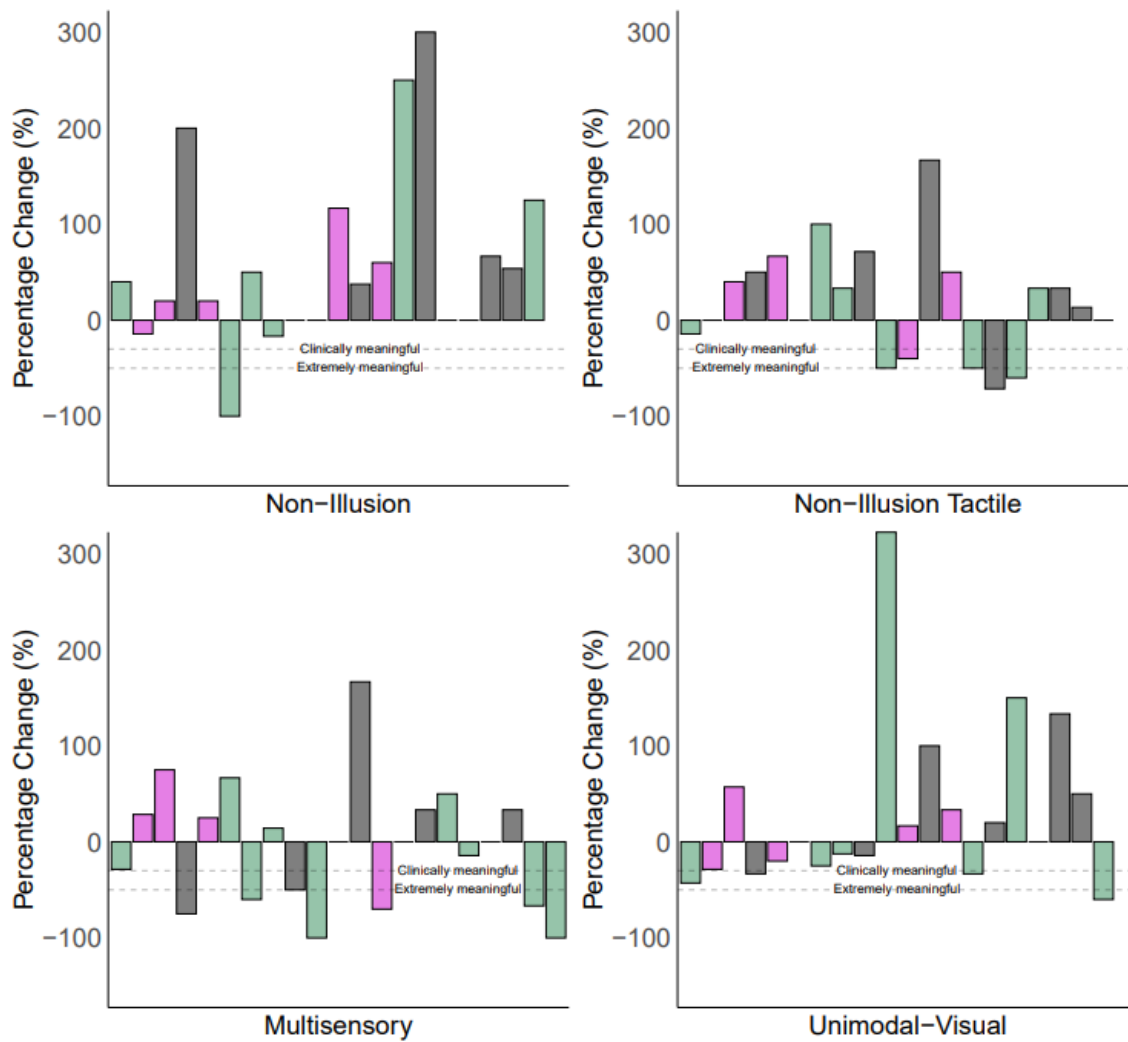

**S10 Fig. Percentage change for pain scores across all conditions per participant.**  
 Dashed lines show 30% pain reduction (clinically meaningful) and 50% pain reduction (extremely meaningful). Bars showing in magenta show participants with chronic primary pain, green for those with chronic secondary pain, and grey for participants with either no diagnosis or a mix of primary and secondary pain conditions.
